# Supplementary material for: QTL Hotspots for Early Vigor and Related Traits under Dry Direct-Seeded System in Rice (Oryza sativa L.)
Source: Front Plant Sci. 2017 Mar 2;8:286. doi: 10.3389/fpls.2017.00286 (PMC5332406; doi:10.3389/fpls.2017.00286)
Supplement: Supplementary file 2 [file Table2.XLSX]

## Sheet: Physiological traits & EUE
Supplementary Table 2. Trait measured in the glasshouse experiment. EUE- early uniform emergence; SHL-shoot length; SL- stem length; TFW- total fresh weight; SFW- shoot fresh weight; RDW- root dry weight; TDW- total dry weight; SDW-shoot dry weight.
Genotype	EUE	SHL_8day	SHL_21day	SL_8day	SL_21day	TFW_8day	TFW_21day	SFW_8day	SFW_21day	RDW_8day	RDW_21day	TDW_8day	TDW_21day	SDW_8day	SDW_21day
IR91648-B-101-B	3	9.225	16.375	3.925	4.45	0.06605	0.12322	0.035925	0.0778263	0.030125	0.044873	0.0127	0.0251546	0.006	0.0168912
IR91648-B-102-B	3	8.775	13.9	3.6	4.85	0.066025	0.0790945	0.031425	0.0512263	0.0346	0.027348	0.011075	0.0168046	0.00485	0.0134912
IR91648-B-103-B	4	8.625	15.9	3.45	5.075	0.057725	0.10697	0.03065	0.0638513	0.027075	0.042598	0.009175	0.0221796	0.0045	0.0144662
IR91648-B-104-B	3	5.45	19.2	2.675	4.525	0.0601	0.0887695	0.022675	0.0540263	0.037425	0.034223	0.00885	0.0159046	0.00295	0.0102412
IR91648-B-105-B	3	7.7	15.65	3.125	5.375	0.049175	0.0959945	0.023075	0.0625513	0.0261	0.032923	0.0097	0.0192046	0.0036	0.0130912
IR91648-B-106-B	3	8.35	16.125	3.6	5.05	0.045475	0.106895	0.026775	0.0658513	0.0187	0.040523	0.0082	0.0190296	0.0048	0.0134162
IR91648-B-107-B	3	7.075	14.35	3.35	4.225	0.054125	0.103245	0.02565	0.0585013	0.028475	0.044223	0.00955	0.0189546	0.00475	0.0126912
IR91648-B-108-B	5	7.85	15.925	3.975	5.725	0.064825	0.118545	0.038175	0.0681013	0.02665	0.049923	0.010075	0.0207546	0.00545	0.0134162
IR91648-B-109-B	6	9.15	12.8	3.95	4.55	0.0603	0.0652445	0.033675	0.0454513	0.026625	0.019273	0.009475	0.0133296	0.00575	0.0098912
IR91648-B-110-B	5	10.3	15.775	5.15	4.75	0.071775	0.0906445	0.040725	0.0558263	0.03105	0.034298	0.0085	0.0171796	0.0051	0.0115162
IR91648-B-111-B	3	7.475	13.8	3.5	3.75	0.0513	0.10287	0.028375	0.0551263	0.022925	0.047223	0.01025	0.0179546	0.00505	0.0113912
IR91648-B-113-B	3	8.175	15.85	3.7	4.475	0.0710524	0.10732	0.036475	0.0628513	0.0345774	0.043948	0.011125	0.0218296	0.0056	0.0142162
IR91648-B-115-B	3	5.275	13.425	2.475	3.75	0.039725	0.0879945	0.02035	0.0547013	0.019375	0.032773	0.00705	0.0152046	0.00315	0.0107912
IR91648-B-116-B	3	8.025	14.525	3.85	4.675	0.0537	0.0847445	0.030125	0.0546763	0.023575	0.029548	0.007625	0.0154296	0.00475	0.0110412
IR91648-B-118-B	3	8.9	15.475	4.8	4.9	0.06635	0.0920695	0.035	0.0579013	0.03135	0.033648	0.0098	0.0168046	0.0056	0.0114912
IR91648-B-119-B	3	6.9	13.95	2.8	4.475	0.057	0.0931445	0.0216	0.0535763	0.0354	0.039048	0.011	0.0162296	0.004	0.0109662
IR91648-B-121-B	3	11.125	16.35	4.975	4.925	0.0751	0.108495	0.03915	0.0698763	0.03595	0.038098	0.010375	0.0228046	0.00665	0.0153912
IR91648-B-122-B	3	7.775	18.225	4.1	7.6	0.05615	0.0898945	0.027075	0.0429738	0.029075	0.0464005	0.00845	0.0149296	0.0043	0.0102162
IR91648-B-123-B	3	8.025	13.375	3.875	4.9	0.061025	0.0859945	0.030475	0.0525513	0.03055	0.032923	0.00965	0.0170796	0.0032	0.0116412
IR91648-B-124-B	3	7.175	14.275	3.35	4.125	0.0566	0.11167	0.029325	0.0749013	0.027275	0.036248	0.010425	0.0203046	0.0054	0.0149412
IR91648-B-125-B	3	5.175	15.175	2.325	4.225	0.04615	0.123545	0.02195	0.0691013	0.0242	0.053923	0.0064	0.0221296	0.0027	0.0154662
IR91648-B-126-B	3	5.675	12.325	2.95	4.1	0.0424	0.0981445	0.0227	0.0517263	0.0197	0.045898	0.00655	0.0128796	0.0028	0.0086162
IR91648-B-127-B	6	9.25	15.325	4.5	4.65	0.06725	0.116195	0.03135	0.0632513	0.0359	0.052423	0.0121	0.0209046	0.0051	0.0140912
IR91648-B-128-B	3	7.5	14.6	3.475	3.875	0.05515	0.0996445	0.0284	0.0671513	0.02675	0.031973	0.009325	0.0179046	0.0046	0.0133912
IR91648-B-129-B	6	7	14.25	3.525	4.825	0.054425	0.0859445	0.02555	0.0547513	0.028875	0.030673	0.0084	0.0149546	0.0031	0.0105662
IR91648-B-12-B	3	6.3	13.375	3.375	4.05	0.0646	0.0891945	0.0273	0.0532013	0.0373	0.035473	0.01235	0.0160296	0.0044	0.0105662
IR91648-B-130-B	3	9.775	13.375	4.575	3.75	0.0666	0.106345	0.036275	0.0692763	0.030325	0.036548	0.01275	0.0202796	0.0061	0.0139412
IR91648-B-131-B	3	7.5	12.05	3.55	3.55	0.0548	0.0791195	0.02575	0.0484013	0.02905	0.030198	0.009	0.0689796	0.0044	0.0644912
IR91648-B-134-B	3	7.95	13.575	3.8	4.45	0.0581	0.0721945	0.031025	0.0483013	0.027075	0.023373	0.0081	0.0133546	0.00415	0.0099662
IR91648-B-135-B	3	7.4	11.825	2.95	3.7	0.051075	0.0865195	0.0277	0.0558263	0.023375	0.030173	0.00825	0.0156296	0.0044	0.0118912
IR91648-B-138-B	5	6.35	12.175	3.2	3.525	0.0389	0.0834195	0.019125	0.0514513	0.019775	0.031448	0.0095	0.0171046	0.00395	0.0107412
IR91648-B-139-B	3	8.05	14.9	3.925	4.425	0.058	0.0712695	0.0294	0.0511013	0.0286	0.019648	0.007	0.0170546	0.0047	0.0171412
IR91648-B-13-B	4	6.025	15.025	3.55	4.55	0.058225	0.0916195	0.0262	0.0617513	0.032025	0.029348	0.012925	0.0176796	0.00455	0.0127162
IR91648-B-142-B	3	8.55	14.725	4.6	3.825	0.0803	0.0987195	0.0359	0.0607013	0.0444	0.037498	0.011	0.0171546	0.0057	0.0123412
IR91648-B-143-B	5	7.35	12.3	3.225	3.3	0.058575	0.0857445	0.029925	0.0507263	0.02865	0.034498	0.009725	0.0166546	0.00435	0.0114912
IR91648-B-144-B	5	7.125	13.575	3.325	3.85	0.05155	0.0914445	0.02475	0.0540513	0.0268	0.036873	0.008775	0.0173046	0.0044	0.0120412
IR91648-B-145-B	6	8.65	13.425	4.325	3.975	0.064925	0.0871445	0.0347	0.0493263	0.030225	0.037298	0.009875	0.0180546	0.00545	0.0128412
IR91648-B-148-B	4	6.3	13.05	2.45	3.475	0.0489	0.0878945	0.02325	0.0566013	0.02565	0.030773	0.008525	0.0166296	0.00535	0.0116412
IR91648-B-149-B	3	7.875	8.325	3.4	3.65	0.060525	0.0854195	0.028075	0.0476263	0.03245	0.037273	0.009725	0.0152796	0.0046	0.0106662
IR91648-B-150-B	6	8.525	17.05	4.175	4.85	0.061225	0.12717	0.035475	0.0761513	0.02575	0.050498	0.011025	0.0225546	0.00595	0.0162412
IR91648-B-152-B	3	6.825	13.975	2.9	3.55	0.0533	0.10482	0.027825	0.0692763	0.025475	0.035023	0.01025	0.0211296	0.00485	0.0152912
IR91648-B-153-B	5	7.525	11.975	3.825	3.625	0.061225	0.0518945	0.032175	0.0438513	0.02905	0.00752299	0.0074	0.00932956	0.0052	0.0074912
IR91648-B-154-B	5	7.6	14.4	3.35	4.75	0.0559	0.0772445	0.02745	0.0527513	0.02845	0.023973	0.010725	0.0143546	0.0052	0.0110162
IR91648-B-155-B	3	5.2	12.925	2.7	4.05	0.0455	0.0857445	0.0245	0.0535013	0.021	0.031723	0.005875	0.0146046	0.00305	0.0102412
IR91648-B-156-B	3	7	15.425	3.525	5.375	0.04815	0.0874195	0.025925	0.0570513	0.022225	0.029848	0.007575	0.0140046	0.00425	0.0102412
IR91648-B-158-B	6	7.1	12.275	3.05	3.8	0.044075	0.0882195	0.027175	0.0546763	0.0169	0.033023	0.0093	0.0175046	0.00465	0.0121162
IR91648-B-159-B	5	6.275	11.65	3	3.6	0.0509	0.0870195	0.025325	0.0508263	0.025575	0.035673	0.008425	0.0164046	0.0039	0.0107412
IR91648-B-15-B	5	8.175	13.95	3.9	4.375	0.04895	0.0944945	0.029275	0.0598763	0.019675	0.034098	0.00735	0.0188796	0.0052	0.0121162
IR91648-B-160-B	5	7.7	13.3	3.175	3.825	0.058025	0.0715695	0.0285	0.0518263	0.029525	0.019223	0.011475	0.0143546	0.00535	0.0104662
IR91648-B-161-B	6	6.95	12.425	3.525	3.95	0.05785	0.0878945	0.0253	0.0505013	0.03255	0.036873	0.00875	0.0149796	0.00405	0.0100662
IR91648-B-162-B	5	8.15	14.8	4.05	4.725	0.054775	0.0775445	0.0313	0.0543513	0.023475	0.022673	0.0068	0.0193296	0.0047	0.0146162
IR91648-B-163-B	3	6.575	12.1	3.45	4.3	0.053425	0.0791945	0.0255	0.0501763	0.027925	0.028498	0.0085	0.0145046	0.0044	0.0097662
IR91648-B-164-B	5	10.575	18.05	5.275	5.575	0.064025	0.12817	0.03685	0.0770513	0.027175	0.050598	0.008675	0.0228546	0.0053	0.0155412
IR91648-B-166-B	6	5.675	13.7	1.9	4.2	0.042325	0.0815445	0.02065	0.0523263	0.021675	0.028698	0.007925	0.0168296	0.00375	0.0123662
IR91648-B-167-B	3	6.75	15.5	3.45	5.675	0.05415	0.0700445	0.0249	0.0433263	0.02925	0.026198	0.01115	0.0144296	0.0045	0.0098662
IR91648-B-16-B	3	8.425	15.25	3.5	4.875	0.067425	0.100145	0.032175	0.0630938	0.03525	0.0365305	0.00725	0.0182796	0.00465	0.0118912
IR91648-B-170-B	3	7.375	13.325	4.075	4.675	0.056375	0.0904695	0.03115	0.0545763	0.025225	0.035373	0.009975	0.0156796	0.005	0.0109162
IR91648-B-171-B	6	9.65	13.825	4.275	3.75	0.048825	0.0914695	0.030625	0.0572263	0.0182	0.033723	0.008275	0.0187046	0.00435	0.0125662
IR91648-B-172-B	3	7.95	13.975	3.775	3.925	0.0607	0.0760445	0.030325	0.0610913	0.030375	0.014433	0.0102	0.0175296	0.00575	0.0129162
IR91648-B-173-B	3	8.025	13.125	4.025	4.1	0.070425	0.0943695	0.03	0.0520263	0.040425	0.041823	0.008375	0.0158546	0.0042	0.0105912
IR91648-B-174-B	3	10.525	14.425	4.05	3.725	0.07575	0.0895445	0.04315	0.0608263	0.0326	0.028198	0.011425	0.0179046	0.0088	0.0127162
IR91648-B-175-B	3	7.7	13.4	3.1	4.175	0.046275	0.0722195	0.0279	0.0522513	0.018375	0.019448	0.004425	0.0163546	0.0038	0.0118662
IR91648-B-176-B	6	5.6	12.9	3.225	3.85	0.039775	0.0731445	0.0186475	0.0465763	0.0211275	0.026048	0.010375	0.0151046	0.00375	0.0097912
IR91648-B-179-B	5	8.675	16.525	3.5	5.225	0.043175	0.0966195	0.0281	0.0663513	0.015075	0.029748	0.0055	0.0193046	0.0047	0.0137412
IR91648-B-17-B	5	7.575	13.775	3.875	4.55	0.065125	0.0882195	0.035325	0.0599513	0.0298	0.027748	0.01005	0.0176546	0.00445	0.0129912
IR91648-B-180-B	5	7	14.075	3.175	3.7	0.053075	0.0969195	0.028675	0.0627013	0.0244	0.033698	0.0071	0.0186796	0.00425	0.0134662
IR91648-B-181-B	3	6.725	12.725	3.4	3.925	0.046725	0.0805945	0.01885	0.0500263	0.027875	0.030048	0.010825	0.0161296	0.00455	0.0106662
IR91648-B-183-B	6	7.8	14.65	4.225	4.15	0.0673	0.0941445	0.03655	0.0623513	0.03075	0.031273	0.012175	0.0187046	0.0059	0.0132662
IR91648-B-184-B	3	8.8	12.35	3.65	3.875	0.05005	0.0637445	0.029275	0.0456763	0.020775	0.017548	0.007025	0.0137046	0.00475	0.0098662
IR91648-B-185-B	3	6.8	11.2	3.325	3.825	0.04565	0.0680445	0.024175	0.0437763	0.021475	0.023748	0.00915	0.0182296	0.00405	0.0127662
IR91648-B-186-B	3	8.225	16.575	3.875	4.85	0.05505	0.0652945	0.02965	0.0521263	0.0254	0.012648	0.008825	0.0179546	0.00555	0.0131162
IR91648-B-187-B	5	8.025	13.575	3.725	3.775	0.056875	0.0678945	0.0305	0.0478888	0.026375	0.0194855	0.005825	0.0114546	0.0024	0.0091412
IR91648-B-188-B	5	8.525	14.275	4.2	4.05	0.071275	0.0971445	0.040875	0.0622013	0.0304	0.034423	0.01035	0.0179546	0.00575	0.0125912
IR91648-B-189-B	3	10.975	15.225	4.875	5.675	0.066775	0.0960695	0.03965	0.0698263	0.027125	0.025723	0.007075	0.0176546	0.0046	0.0130412
IR91648-B-18-B	3	8.65	14.9	4.05	4.5	0.06015	0.0968195	0.03485	0.0619513	0.0253	0.034348	0.00925	0.0175296	0.0053	0.0134162
IR91648-B-190-B	3	6.225	14.9	3	4.275	0.052025	0.0815695	0.027	0.0558263	0.025025	0.025223	0.006425	0.0165546	0.00425	0.0125162
IR91648-B-191-B	3	9.4	13.775	4	4.65	0.058225	0.0759945	0.034125	0.0547513	0.0241	0.020723	0.0109	0.0160046	0.005	0.0115662
IR91648-B-193-B	3	6.6	12.8	2.55	3.375	0.040775	0.0693445	0.020675	0.0441013	0.0201	0.024723	0.007325	0.0148046	0.00385	0.0102912
IR91648-B-195-B	5	7.675	11.225	3.45	3.2	0.045875	0.0671695	0.02965	0.0424013	0.016225	0.024248	0.00775	0.0123296	0.0038	0.0084662
IR91648-B-196-B	3	7.675	12.6	3.45	3.55	0.06065	0.0764695	0.030875	0.0453513	0.029775	0.030598	0.0105	0.0144296	0.0049	0.0102412
IR91648-B-197-B	5	8.7	13.55	3.825	4.275	0.0612	0.0887195	0.033675	0.0548763	0.027525	0.033323	0.0106	0.0173796	0.0069	0.0116662
IR91648-B-198-B	5	8.2	16.875	4.2	5.2	0.046675	0.0883195	0.029625	0.0596513	0.01705	0.028148	0.006175	0.0165796	0.0043	0.0121912
IR91648-B-199-B	3	7.175	13.275	3.125	4.25	0.056625	0.0804195	0.02925	0.0531763	0.027375	0.026723	0.007525	0.0169296	0.0052	0.0112162
IR91648-B-19-B	5	8.7	15.1	3.9	4.675	0.059925	0.10262	0.03245	0.0658013	0.027475	0.036298	0.011175	0.0201546	0.0052	0.0138662
IR91648-B-1-B	5	6.95	12.65	2.95	4.175	0.04835	0.0654945	0.02455	0.0454763	0.0238	0.019498	0.009225	0.0125296	0.0044	0.0097412
IR91648-B-200-B	3	6.2	12.4	2.95	3.525	0.05	0.0757945	0.0249	0.0486013	0.0251	0.026673	0.010625	0.0156546	0.0044	0.0097412
IR91648-B-201-B	3	7.575	12.45	3.975	3.8	0.057875	0.0710195	0.029425	0.0422263	0.02845	0.028273	0.009575	0.0133046	0.0064	0.0089412
IR91648-B-203-B	3	8.325	13.3	4.1	4.1	0.056475	0.0757695	0.029225	0.0456013	0.02725	0.029648	0.00825	0.0133546	0.0046	0.0093912
IR91648-B-204-B	3	8.25	11.725	4.275	3.675	0.05945	0.0751945	0.0312	0.0479763	0.02825	0.026698	0.0091	0.0156796	0.0042	0.0108912
IR91648-B-205-B	5	7.2	11.55	3.1	3.325	0.046925	0.0700695	0.024	0.0477763	0.022925	0.021773	0.0092	0.0150046	0.00405	0.0095912
IR91648-B-206-B	5	7.65	15.125	3.325	4.325	0.051425	0.0945195	0.027375	0.0643013	0.02405	0.029698	0.01065	0.0186796	0.00515	0.0123412
IR91648-B-207-B	6	7.65	14.875	3.475	4.475	0.05065	0.0782695	0.026125	0.0484263	0.024525	0.029323	0.008225	0.0145296	0.0043	0.0105162
IR91648-B-208-B	5	7.25	15.55	2.975	4.575	0.048525	0.0970195	0.021125	0.0633763	0.0274	0.033123	0.01065	0.0209046	0.00445	0.0144662
IR91648-B-209-B	3	6.3	11.45	3.3	3.925	0.049875	0.0818195	0.02225	0.0484513	0.027625	0.032848	0.0059	0.0130546	0.003	0.0086162
IR91648-B-210-B	3	6.4	11.025	3.275	4.025	0.054025	0.0582445	0.027625	0.0411263	0.0264	0.016598	0.00485	0.0114796	0.0036	0.0084412
IR91648-B-211-B	3	6.675	14.3	3.475	4.275	0.05835	0.104595	0.0313	0.0650013	0.02705	0.039073	0.0097	0.0140796	0.00475	0.0094162
IR91648-B-212-B	3	7.1	13.5	3.15	4.7	0.048225	0.0908445	0.0265	0.0608263	0.021725	0.029498	0.00715	0.0153796	0.0041	0.0122412
IR91648-B-214-B	3	8.075	12.55	3.65	3.775	0.04725	0.0834195	0.0259	0.0546013	0.02135	0.028298	0.01225	0.0165296	0.00565	0.0114662
IR91648-B-215-B	3	6.775	14.5	3.75	4.4	0.0513	0.0810195	0.026925	0.0542013	0.024375	0.026298	0.0096	0.0167796	0.0044	0.0122662
IR91648-B-216-B	3	5.95	15.25	2.475	4.5	0.042375	0.100945	0.021	0.0580263	0.021375	0.042398	0.0068	0.0187296	0.00355	0.0123662
IR91648-B-217-B	5	8.35	12.35	3.9	3.8	0.06995	0.0626445	0.03705	0.0481263	0.0329	0.013998	0.0105	0.0141046	0.0054	0.0111662
IR91648-B-219-B	3	7.6	12.9	3.3	3.975	0.057975	0.0789445	0.028775	0.0508263	0.0292	0.027598	0.01015	0.0157296	0.0049	0.0114162
IR91648-B-224-B	3	9.5	13.9	3.725	4.15	0.048325	0.0766945	0.031075	0.0508013	0.01725	0.025373	0.00895	0.0146796	0.0044	0.0098912
IR91648-B-227-B	3	8.225	15.15	3.475	3.975	0.07155	0.0933695	0.037025	0.0582263	0.034525	0.034623	0.011125	0.0174796	0.00615	0.0122162
IR91648-B-228-B	3	7.125	15.125	3.1	4.8	0.0456	0.0840945	0.02235	0.0563763	0.02325	0.027198	0.008575	0.0160046	0.0033	0.0110662
IR91648-B-229-B	5	6	15.025	3.375	4.15	0.03195	0.103245	0.018525	0.0646013	0.013425	0.038123	0.00835	0.0209046	0.0038	0.0145462
IR91648-B-230-B	3	9.375	17.675	4	4.975	0.056425	0.11067	0.032775	0.0679263	0.02365	0.042223	0.00965	0.0204046	0.00515	0.0135662
IR91648-B-231-B	4	7.775	13.7	4	4	0.058425	0.0922945	0.030225	0.0567513	0.0282	0.035023	0.010075	0.0173546	0.0048	0.0124162
IR91648-B-232-B	6	5.85	12.625	2.175	3.275	0.0439	0.0831945	0.021525	0.0505263	0.022375	0.032148	0.009085	0.0166046	0.0041	0.0113162
IR91648-B-233-B	3	6.175	13.3	3.9	3.4	0.072725	0.0938445	0.028975	0.0520013	0.04375	0.041323	0.01025	0.0172546	0.0047	0.0123162
IR91648-B-234-B	3	7.95	13.125	3.6	4.425	0.0551	0.0735695	0.030375	0.0529763	0.024725	0.020073	0.008525	0.0153046	0.0051	0.0112412
IR91648-B-235-B	6	6.95	14.425	3.125	4.125	0.049	0.0810945	0.027475	0.0502763	0.021525	0.030298	0.0089	0.0155046	0.0043	0.0108162
IR91648-B-236-B	3	7.65	10.75	3.375	4.075	0.046725	0.0750195	0.02585	0.0437013	0.020875	0.030798	0.01055	0.0121546	0.00455	0.0078412
IR91648-B-237-B	3	6.45	12.975	3.5	3.375	0.055625	0.0895945	0.0259	0.0541263	0.029725	0.034948	0.0099	0.0180796	0.0039	0.0127412
IR91648-B-238-B	3	7.3	13.8	3.175	3.825	0.058	0.0875695	0.0296	0.0523013	0.0284	0.034748	0.00925	0.0178546	0.00525	0.0120662
IR91648-B-239-B	3	6.825	14.875	3.65	4	0.049275	0.0907195	0.02265	0.0595513	0.026625	0.030648	0.011525	0.0179546	0.0045	0.0125162
IR91648-B-23-B	3	6.725	13.725	3.275	4.15	0.05625	0.0944195	0.030175	0.0557663	0.026075	0.038133	0.008025	0.0115296	0.00395	0.0075662
IR91648-B-241-B	3	8.5	16	4.125	4.4	0.079725	0.10057	0.03885	0.0562763	0.040875	0.043773	0.013125	0.0187546	0.006	0.0125662
IR91648-B-242-B	3	5.975	13.55	3.075	4.2	0.052375	0.0847195	0.025575	0.0543513	0.0268	0.029848	0.00955	0.0165296	0.004	0.0119162
IR91648-B-243-B	3	7.3	12.825	3.6	3.5	0.053	0.0851445	0.028325	0.0509763	0.024675	0.033648	0.00875	0.0188546	0.0052	0.0126662
IR91648-B-244-B	3	7.3	16.975	3.8	5.275	0.06275	0.113245	0.034225	0.0737763	0.028525	0.038948	0.010575	0.0228296	0.00585	0.0163412
IR91648-B-246-B	4	7.2	12.175	3.125	4.175	0.05315	0.0682695	0.0278	0.0434263	0.02535	0.024323	0.00895	0.0137796	0.004	0.0100162
IR91648-B-248-B	3	8.775	11.55	4.3	4.4	0.0617	0.0777445	0.033475	0.0467013	0.028225	0.030523	0.006375	0.0130046	0.0048	0.0093412
IR91648-B-24-B	3	6.75	12.15	4.225	3.75	0.06205	0.0722695	0.0298	0.0469513	0.03225	0.024798	0.0113	0.0146046	0.00475	0.0106912
IR91648-B-250-B	6	5.65	14.15	2.6	3.825	0.038525	0.100545	0.018525	0.0590513	0.02	0.040973	0.00665	0.0171296	0.0031	0.0123912
IR91648-B-251-B	6	5.75	13.1	2.65	3.9	0.039025	0.0831945	0.0207	0.0547013	0.018325	0.027973	0.008325	0.0174546	0.0033	0.0126162
IR91648-B-252-B	6	6.125	13.8	3.4	4.35	0.05155	0.10752	0.023	0.0711013	0.02855	0.035898	0.0134985	0.0204546	0.0063	0.0134662
IR91648-B-253-B	3	7.45	11.6	3.15	4.45	0.046425	0.0707695	0.0284725	0.0469263	0.0179525	0.023323	0.0089	0.0144546	0.0039	0.0071662
IR91648-B-254-B	3	8.575	13.65	4	4.175	0.05795	0.0748695	0.0331	0.0589013	0.02485	0.015448	0.0073	0.0161046	0.0053	0.0120412
IR91648-B-255-B	3	7.075	11.575	3.4	4.375	0.063225	0.0936695	0.029	0.0559013	0.034225	0.037248	0.008175	0.0166796	0.0045	0.0116662
IR91648-B-256-B	3	6.1	11.8	2.9	3.775	0.045425	0.0722195	0.021625	0.0448263	0.0238	0.026873	0.0064	0.0124546	0.00345	0.0085912
IR91648-B-257-B	6	7.3	14.7	4	4.875	0.057375	0.0863225	0.029475	0.0563263	0.0279	0.029476	0.006275	0.0150296	0.00465	0.0113662
IR91648-B-259-B	2	8.15	12.175	3.225	3.575	0.056175	0.0769945	0.0303	0.0472263	0.025875	0.029248	0.0093	0.0137296	0.0046	0.0096662
IR91648-B-261-B	3	9.4	17.9	3.75	4.825	0.064375	0.0950195	0.035975	0.0688013	0.0284	0.025698	0.00645	0.0173296	0.0054	0.0126912
IR91648-B-262-B	3	7.95	14.175	3.225	5.175	0.052475	0.0689945	0.025125	0.0491013	0.02735	0.019373	0.008875	0.0120546	0.00435	0.0100412
IR91648-B-263-B	3	6.45	13.95	3.325	4.05	0.0434	0.088082	0.020325	0.0563863	0.023075	0.0311755	0.01065	0.0180046	0.0042	0.0122412
IR91648-B-264-B	3	6.825	12.2	3.25	3.95	0.045225	0.0704945	0.024375	0.0459763	0.02085	0.023998	0.007025	0.0145796	0.0041	0.0108412
IR91648-B-265-B	3	7.325	15.5	3.65	4.675	0.055325	0.0967695	0.03075	0.0620513	0.024575	0.034198	0.01075	0.0186796	0.00555	0.0126162
IR91648-B-266-B	3	7.5	14.125	3.2	4.7	0.0257	0.0662945	0.01175	0.0425013	0.01395	0.023273	0.0085	0.00965456	0.0061	0.0116162
IR91648-B-267-B	3	5.725	12.35	2.725	3.675	0.0507575	0.0827945	0.0233	0.0496513	0.0274575	0.032623	0.00795	0.0148796	0.00365	0.0092412
IR91648-B-269-B	5	5.925	13.775	2.375	4.025	0.04315	0.0937195	0.0209	0.0575263	0.02225	0.035673	0.00785	0.0174046	0.00335	0.0124412
IR91648-B-26-B	3	7.05	12.975	3.375	3.525	0.04545	0.0723695	0.0252	0.0435263	0.02025	0.028323	0.007475	0.0142046	0.0037	0.0089662
IR91648-B-270-B	3	8.225	13.85	3.75	3.875	0.0579	0.0985695	0.029115	0.0586513	0.028785	0.039398	0.00925	0.0180296	0.0048	0.0124162
IR91648-B-271-B	3	7.85	7.125	4	2.6	0.059825	0.0305945	0.0318	0.0220013	0.028025	0.00807299	0.006375	0.00470456	0.00395	0.0046412
IR91648-B-272-B	5	6.6	13.4	3.2	3.625	0.039475	0.0972445	0.019475	0.0673263	0.02	0.029398	0.01025	0.0184546	0.004	0.0118162
IR91648-B-273-B	3	7.05	20.475	3.225	5.225	0.046375	0.14497	0.022025	0.0824263	0.02435	0.062023	0.010725	0.0274296	0.0062	0.0163662
IR91648-B-274-B	3	8.325	17.825	3.875	5.075	0.0614275	0.119095	0.02805	0.0685763	0.0333775	0.049998	0.010575	0.0229296	0.00475	0.0161162
IR91648-B-275-B	3	5.4	12.175	2.275	3.425	0.03455	0.0767695	0.018	0.0461513	0.01655	0.030098	0.007575	0.0145046	0.0035	0.0102912
IR91648-B-276-B	5	8.225	14.875	3.725	4.9	0.064825	0.0787195	0.032875	0.0586513	0.03195	0.019548	0.009325	0.0177296	0.00535	0.0137912
IR91648-B-277-B	3	7.025	14.925	3.325	4.5	0.05795	0.106345	0.028325	0.0614013	0.029625	0.044423	0.00955	0.0183046	0.00435	0.0131912
IR91648-B-279-B	3	7.575	14.35	4.25	3.625	0.07065	0.11387	0.03325	0.0712763	0.0374	0.042073	0.0103	0.0214796	0.00535	0.0152412
IR91648-B-282-B	3	6.95	14.325	3.775	4.25	0.051275	0.0976445	0.02595	0.0610263	0.025325	0.036098	0.0089	0.0184296	0.00445	0.0132162
IR91648-B-283-B	3	7.275	11.775	4.525	3.75	0.05755	0.0601695	0.030925	0.0426013	0.026625	0.017048	0.009825	0.0113546	0.005	0.0088162
IR91648-B-284-B	5	11.475	13.425	4.425	3.65	0.08965	0.089287	0.046625	0.0597088	0.043025	0.029058	0.008625	0.0167796	0.00565	0.0120412
IR91648-B-285-B	3	6.5	15.55	3.125	4.85	0.03725	0.106145	0.021225	0.0643013	0.016025	0.041323	0.00685	0.0195046	0.0034	0.0136912
IR91648-B-286-B	3	8.675	15.3	4.175	3.875	0.059275	0.102495	0.034375	0.0691263	0.0249	0.032848	0.0111	0.0197046	0.00685	0.0146662
IR91648-B-287-B	3	8.425	14.7	3.975	4.6	0.069375	0.10877	0.0361	0.0695763	0.033275	0.038673	0.01165	0.0213796	0.00635	0.0151912
IR91648-B-288-B	3	7.35	13.2	3.625	3.8	0.054625	0.0745695	0.03045	0.0530513	0.024175	0.020998	0.007325	0.0184546	0.00545	0.0144162
IR91648-B-289-B	6	5.225	13.125	2.275	3.8	0.042525	0.0762445	0.021075	0.0498063	0.02145	0.025918	0.007675	0.0151546	0.00195	0.0110162
IR91648-B-28-B	7	7.35	13.175	3.075	3.95	0.050775	0.0766695	0.024275	0.0513513	0.0265	0.024798	0.00775	0.0138546	0.00405	0.0100912
IR91648-B-290-B	5	7.375	14.2	3.625	4.025	0.050175	0.0922195	0.02805	0.0571513	0.022125	0.034548	0.009375	0.0171796	0.00505	0.0118412
IR91648-B-291-B	3	7.2	10.925	3.275	3.375	0.06565	0.0979695	0.0311	0.0576913	0.03455	0.039758	0.009675	0.0184046	0.00535	0.0124162
IR91648-B-292-B	6	7.35	14.125	3.375	4.025	0.05665	0.0912945	0.0305	0.0609763	0.02615	0.029798	0.00775	0.0180046	0.00525	0.0135412
IR91648-B-293-B	3	8.1	14.75	4.05	4.2	0.063075	0.0880445	0.029625	0.0561013	0.03345	0.031423	0.01035	0.0177296	0.005	0.0119912
IR91648-B-294-B	3	6.875	14.95	3.525	4.65	0.0454625	0.0985695	0.026775	0.0674263	0.0186875	0.030623	0.01105	0.0187046	0.00445	0.0145662
IR91648-B-295-B	3	7.4	16.3	4.4	4.625	0.06565	0.10042	0.035775	0.0637763	0.029875	0.036123	0.009375	0.0180546	0.0052	0.0131662
IR91648-B-296-B	4	6.675	13.175	3.175	3.775	0.0605	0.0845945	0.0276	0.0584263	0.0329	0.025648	0.00785	0.0173296	0.00515	0.0124912
IR91648-B-297-B	3	8.05	14.475	3.6	4.45	0.04135	0.11142	0.0259	0.0595013	0.01545	0.051398	0.009	0.0201546	0.005	0.0130412
IR91648-B-299-B	3	7.125	13.775	2.9	3.825	0.0554	0.0951195	0.02775	0.0602763	0.02765	0.034323	0.009075	0.0166546	0.0051	0.0121662
IR91648-B-29-B	5	6.875	13.45	3.075	3.95	0.06315	0.0808695	0.039325	0.0633763	0.023825	0.016973	0.008425	0.0152296	0.0048	0.0114912
IR91648-B-2-B	3	8.3	14.725	4	4.175	0.05695	0.0972945	0.032575	0.0621513	0.024375	0.034623	0.009675	0.0210546	0.00545	0.0144662
IR91648-B-300-B	3	6.925	17.65	3.2	5.025	0.050425	0.0935945	0.0265	0.0723763	0.023925	0.020698	0.0083	0.0242796	0.00475	0.0164412
IR91648-B-301-B	3	8.125	17.05	3.95	4.925	0.069275	0.10212	0.0329	0.0565763	0.036375	0.045023	0.0102	0.0170296	0.00495	0.0115412
IR91648-B-302-B	6	8.45	13.775	4.25	3.975	0.048175	0.0780195	0.02585	0.0524263	0.022325	0.025073	0.008425	0.0167296	0.00445	0.0120162
IR91648-B-303-B	6	6.325	13.5	2.55	3.775	0.0486	0.100795	0.024475	0.0634263	0.024125	0.036848	0.01045	0.0199296	0.00465	0.0142162
IR91648-B-304-B	3	7.8	14.475	3.725	3.4	0.054875	0.0875195	0.0271	0.0498513	0.027775	0.037148	0.011	0.0163796	0.005	0.0104412
IR91648-B-305-B	3	7.8	14.375	5.05	4.125	0.060775	0.0748195	0.028825	0.0548763	0.03195	0.019423	0.0094	0.0158796	0.00535	0.0121412
IR91648-B-306-B	6	7.55	12.4	4	3.95	0.05315	0.0866695	0.028025	0.0500763	0.025125	0.036073	0.00745	0.0145796	0.0045	0.0101162
IR91648-B-307-B	6	7.25	14.125	3.225	4.125	0.0504	0.0841695	0.026725	0.0610263	0.023675	0.022623	0.00875	0.0182296	0.0042	0.0136912
IR91648-B-308-B	3	7.45	11.8	3.225	3.7	0.05465	0.0702695	0.030375	0.0489513	0.024275	0.020798	0.00685	0.0136796	0.00485	0.0101662
IR91648-B-309-B	4	5.7	11.925	2.45	4.1	0.04625	0.0606695	0.022925	0.0446013	0.023325	0.015548	0.005675	0.0110296	0.00375	0.0081662
IR91648-B-30-B	4	8.1	13.55	3.8	4.25	0.0608	0.0839195	0.036	0.0599013	0.0248	0.023498	0.006875	0.0159796	0.005	0.0118662
IR91648-B-311-B	3	7.925	18.025	4.125	5.05	0.05665	0.10717	0.035125	0.0680263	0.021525	0.038623	0.00865	0.0198546	0.00465	0.0142662
IR91648-B-315-B	3	7.975	14.925	3.125	4.525	0.049975	0.0885195	0.026075	0.0604013	0.0239	0.027598	0.01045	0.0200796	0.00475	0.0138412
IR91648-B-316-B	3	7.5	14.45	2.975	4.05	0.055325	0.0971195	0.0272	0.0624013	0.028125	0.034198	0.0086	0.0175046	0.00425	0.0131162
IR91648-B-317-B	3	5.1	12.45	2.35	3.475	0.033625	0.10622	0.018775	0.0575013	0.01485	0.048198	0.00605	0.0182296	0.00325	0.0120912
IR91648-B-318-B	6	10.125	11.65	4.325	3.625	0.064425	0.0657195	0.03835	0.0448763	0.026075	0.020323	0.007825	0.0150546	0.0063	0.0101162
IR91648-B-319-B	6	7.425	14.75	3.475	4.375	0.05375	0.0914695	0.02735	0.0604763	0.0264	0.030473	0.006825	0.0173546	0.00395	0.0128662
IR91648-B-31-B	5	8.15	14.25	3.625	4.325	0.0644	0.0808445	0.0339	0.0624763	0.0305	0.017848	0.00635	0.0182796	0.00505	0.0135162
IR91648-B-320-B	3	6.725	21.25	2.975	5.6	0.052	0.12292	0.02525	0.0866013	0.02675	0.035798	0.009275	0.0245546	0.004	0.0189412
IR91648-B-322-B	5	8.175	13.15	3.5	4	0.0536	0.0820445	0.02915	0.0544263	0.02445	0.027098	0.00995	0.0160296	0.0054	0.0123912
IR91648-B-323-B	6	8	16	3.4	5.45	0.046575	0.0876695	0.026325	0.0602513	0.02025	0.026898	0.007175	0.0154046	0.00375	0.0117162
IR91648-B-324-B	6	7	13.375	3	3.725	0.05005	0.0979195	0.027275	0.0613013	0.022775	0.036098	0.008475	0.0188296	0.00415	0.0133662
IR91648-B-325-B	3	8.1	14.5	3.65	4.275	0.061255	0.0943945	0.032325	0.0617013	0.02893	0.032173	0.0105	0.0181296	0.0055	0.0128912
IR91648-B-326-B	3	6.85	11.8	3.2	3.925	0.04975	0.0612945	0.02425	0.0407513	0.0255	0.020023	0.00755	0.0115546	0.0035	0.0072912
IR91648-B-327-B	3	7.4	14.1	3.9	4.2	0.0457	0.0945195	0.02165	0.0567263	0.02405	0.037273	0.011	0.0177546	0.0051	0.0112912
IR91648-B-329-B	5	4.45	10.875	2.25	3.55	0.0385	0.0743195	0.025225	0.0470263	0.013275	0.026773	0.006525	0.0137296	0.00305	0.0104162
IR91648-B-32-B	4	8.375	16.975	3.125	4.85	0.04805	0.110095	0.029775	0.0742263	0.018275	0.035348	0.0091	0.0211296	0.0047	0.0153662
IR91648-B-330-B	3	7.55	13.675	3.5	3.85	0.04705	0.0921195	0.02545	0.0612263	0.0216	0.030373	0.0106	0.0185046	0.00465	0.0130662
IR91648-B-331-B	3	7.95	13.625	4.2	3.675	0.07215	0.0961445	0.03845	0.0643513	0.0337	0.031273	0.01225	0.0186796	0.0065	0.0132162
IR91648-B-334-B	5	8.625	14.7	4.125	3.975	0.063375	0.10202	0.026325	0.0583513	0.03705	0.043148	0.0094	0.0174546	0.006	0.0119662
IR91648-B-335-B	5	7.9	13	3.85	4.15	0.0494	0.0799595	0.025475	0.0521513	0.023925	0.027288	0.00815	0.0144046	0.00465	0.0106912
IR91648-B-336-B	3	7.1	10.025	3.425	3.4	0.05815	0.0576195	0.028475	0.0399013	0.029675	0.017198	0.0089	0.00915456	0.00445	0.0070912
IR91648-B-337-B	5	8.45	11.925	3.525	3.775	0.052175	0.0757445	0.030575	0.0506763	0.0216	0.024548	0.011275	0.0142046	0.00505	0.0101162
IR91648-B-338-B	3	7.75	14.625	3.775	3.975	0.06535	0.0943445	0.032975	0.0715763	0.032375	0.022248	0.008675	0.0182046	0.00545	0.0130912
IR91648-B-339-B	3	7.175	12.625	3.325	3.75	0.056825	0.0967945	0.029275	0.0538513	0.02755	0.042423	0.0091	0.0163046	0.00485	0.0111162
IR91648-B-340-B	3	9.225	14.9	4.3	4.55	0.056475	0.0781195	0.03445	0.0520013	0.022025	0.025598	0.00685	0.0163546	0.00405	0.0117912
IR91648-B-341-B	5	7.65	19.25	4.1	5.375	0.05195	0.109695	0.027475	0.0723263	0.024475	0.036848	0.0077925	0.0200796	0.0041	0.0143162
IR91648-B-342-B	3	8.3	18.575	4.275	4.475	0.073175	0.12512	0.03865	0.0860513	0.034525	0.038548	0.00845	0.0207046	0.0059	0.0136662
IR91648-B-343-B	3	6.575	15.025	2.725	3.925	0.0425	0.0958445	0.0201	0.0637263	0.0224	0.031598	0.0097	0.0175196	0.0037	0.0113812
IR91648-B-344-B	3	7.2	12.45	3.7	3.425	0.0541	0.0913445	0.031625	0.0554013	0.022475	0.035423	0.0095	0.0160046	0.0055	0.0113162
IR91648-B-345-B	3	8.125	11.2	3.65	3.35	0.05675	0.0700945	0.034325	0.0426013	0.022425	0.026973	0.011975	0.0126046	0.00605	0.0086912
IR91648-B-346-B	5	7.375	17.175	3.15	4.275	0.0693	0.10327	0.027075	0.0626013	0.042225	0.040148	0.0114	0.0206046	0.0077	0.0134912
IR91648-B-347-B	7	6.225	14.35	3.125	3.95	0.041675	0.0907445	0.020175	0.0562513	0.0215	0.033973	0.009875	0.0180546	0.00405	0.0128162
IR91648-B-348-B	3	4.725	13.1	2.35	8.175	0.033975	0.100045	0.0185	0.0640013	0.015475	0.035523	0.006825	0.0178546	0.0032	0.0132412
IR91648-B-349-B	5	5.075	11.85	2.45	3.775	0.047925	0.0797195	0.01945	0.0481263	0.028475	0.031073	0.0073055	0.0130546	0.0047	0.0094162
IR91648-B-350-B	3	6.175	14.15	2.5	4.125	0.045875	0.0974945	0.02315	0.0608263	0.022725	0.036148	0.009425	0.0182796	0.00475	0.0132162
IR91648-B-351-B	3	8.4	13.4	3.8	4.95	0.0714	0.0924195	0.03745	0.0597263	0.03395	0.032173	0.00945	0.0175546	0.0066	0.0129662
IR91648-B-352-V	3	5.175	14.825	2.6	5.1	0.03785	0.0821945	0.0207	0.0543513	0.01715	0.027323	0.005825	0.0144296	0.00275	0.0103162
IR91648-B-353-B	5	6.85	13.925	3.1	3.725	0.04865	0.0862945	0.024875	0.0568263	0.023775	0.028948	0.011875	0.0181796	0.0057	0.0121412
IR91648-B-354-B	5	7.575	15.45	3.475	4.175	0.0541	0.0925945	0.027225	0.0614263	0.026875	0.030648	0.010525	0.0156296	0.00445	0.0112912
IR91648-B-356-B	3	6.6	14.275	2.75	4.75	0.05315	0.0809945	0.025575	0.0557013	0.027575	0.024773	0.00755	0.0160046	0.0042	0.0112662
IR91648-B-357-B	3	8.325	16.75	4.075	4.525	0.069725	0.11437	0.028575	0.0784513	0.04115	0.035398	0.009175	0.0234296	0.0057	0.0173912
IR91648-B-358-B	3	8.05	11.45	3.775	3.825	0.0655	0.0737695	0.031875	0.0471763	0.033625	0.026073	0.01055	0.0138046	0.00475	0.0092662
IR91648-B-359-B	6	9.1	12.925	3.75	4.125	0.0679	0.0781195	0.03625	0.0490263	0.03165	0.028573	0.01055	0.0140796	0.0065	0.0102412
IR91648-B-35-B	3	9.525	13.075	4.325	4.35	0.064475	0.0702445	0.0385	0.0444763	0.025975	0.025248	0.010725	0.0118546	0.00545	0.0080412
IR91648-B-360-B	3	8.375	14.05	3.625	4.025	0.043725	0.0694195	0.026125	0.0477513	0.0176	0.021148	0.0062	0.0141796	0.00395	0.0101662
IR91648-B-361-B	3	6.35	14.85	3.1	4.25	0.0525	0.0981695	0.027875	0.0646513	0.024625	0.032998	0.008075	0.0186046	0.0043	0.0136412
IR91648-B-362-B	6	7.575	12.225	3.95	7.075	0.059975	0.0853945	0.026875	0.0511513	0.0331	0.033723	0.00855	0.0150796	0.0032	0.0109162
IR91648-B-363-B	5	6.6	13.5	2.45	4.1	0.04465	0.0818445	0.0205	0.0513763	0.02415	0.029948	0.0081	0.0164796	0.0035	0.0112662
IR91648-B-364-B	3	8.675	13.05	4.025	4.475	0.056675	0.0848195	0.0315	0.0547763	0.025175	0.029523	0.0103	0.0173796	0.0053	0.0119912
IR91648-B-365-B	3	6.35	11.175	3.375	3.725	0.06665	0.0988195	0.029325	0.0530513	0.037325	0.045248	0.00885	0.0145546	0.0039	0.0112412
IR91648-B-367-B	5	7.475	12.975	3.8	3.65	0.05495	0.0924445	0.03035	0.0595013	0.0246	0.032423	0.0062	0.0191796	0.0048	0.0137662
IR91648-B-368-B	5	7.175	14.4	4.625	4.4	0.05855	0.0849695	0.03075	0.0566513	0.0278	0.027798	0.009475	0.0175796	0.00495	0.0117912
IR91648-B-369-B	5	6.65	14.425	4.025	4.9	0.046675	0.0617195	0.02065	0.0370013	0.026025	0.024198	0.009125	0.0109546	0.00435	0.0073162
IR91648-B-36-B	3	6.9	12.85	2.725	3.975	0.047775	0.0755195	0.026475	0.0494013	0.0213	0.025598	0.00695	0.0138296	0.00435	0.0102162
IR91648-B-370-B	5	6.65	13.45	2.7	3.9	0.0448	0.0828695	0.0242	0.0548263	0.0206	0.027523	0.00585	0.0151796	0.0021	0.0115912
IR91648-B-372-B	3	7.625	15.1	3.75	4.25	0.05815	0.0665945	0.0254	0.0519513	0.03275	0.014123	0.0105	0.0197796	0.0047	0.0131912
IR91648-B-373-B	5	8	15.15	3.875	4.7	0.048025	0.0912195	0.028375	0.0614513	0.01965	0.029248	0.005875	0.0162796	0.0045	0.0112912
IR91648-B-374-B	3	8.625	13.85	4.3	4.65	0.05985	0.0875695	0.03115	0.0535013	0.0287	0.033548	0.006875	0.0160546	0.00455	0.0100412
IR91648-B-375-B	5	6.1	14.65	3.175	3.9	0.0875	0.0897195	0.02035	0.0554013	0.06715	0.033798	0.010225	0.0181046	0.00425	0.0117162
IR91648-B-377-B	3	6.325	12.5	3.15	3.175	0.06095	0.0956195	0.022815	0.0554263	0.038135	0.039673	0.00825	0.0166796	0.00435	0.0114912
IR91648-B-378-B	5	5.575	10.5	2.65	3.175	0.029825	0.062367	0.017675	0.0447513	0.01215	0.0170955	0.00655	0.00757956	0.0029	0.0055912
IR91648-B-379-B	3	7.45	10.3	3.75	3.1	0.06595	0.0641945	0.032275	0.0389013	0.033675	0.024773	0.007125	0.0110796	0.0045	0.0079412
IR91648-B-37-B	3	7.275	13.175	4.125	4.025	0.053675	0.0777445	0.029225	0.0496263	0.02445	0.027598	0.010325	0.0172296	0.00495	0.0114662
IR91648-B-380-B	3	6.65	11.95	2.85	3.875	0.06485	0.0678445	0.029325	0.0481013	0.035525	0.019223	0.0106	0.0144796	0.0034	0.0109412
IR91648-B-381-B	6	7.025	13.225	4.1	4.575	0.050925	0.0816695	0.028325	0.0494263	0.0226	0.031723	0.007625	0.0130046	0.00405	0.0090662
IR91648-B-383-B	3	7.1	12.575	3.225	3.975	0.0557	0.0838195	0.027575	0.0495513	0.028125	0.033748	0.008525	0.0148046	0.00395	0.0101412
IR91648-B-384-B	6	7.275	14.2	2.825	3.85	0.04865	0.0904945	0.0251	0.0637763	0.02355	0.026198	0.00965	0.0168296	0.0048	0.0121212
IR91648-B-386-B	5	6.6	15.1	3.65	4.2	0.0397	0.0797195	0.01935	0.0498513	0.02035	0.029348	0.01085	0.0162546	0.00425	0.0108162
IR91648-B-38-B	3	8.25	13.725	3.625	4.4	0.040125	0.0706695	0.0243	0.0539263	0.015825	0.016223	0.004175	0.0134546	0.00325	0.0100912
IR91648-B-39-B	3	8.65	14.775	3.45	3.675	0.057975	0.127795	0.031825	0.0829013	0.02615	0.044373	0.011325	0.0243546	0.006	0.0174912
IR91648-B-3-B	3	9.15	14.575	4.35	4.1	0.06945	0.0580945	0.037	0.0410513	0.03245	0.016523	0.008	0.0146046	0.0056	0.0086912
Moroberekan	6	6.9875	13.875	3.1875	3.7125	0.0430875	0.10435	0.0249875	0.065025	0.0181	0.039325	0.0098375	0.0199375	0.0045	0.0161125
Swarna	4	6.6125	18.7125	3.65	4.6625	0.070875	0.131375	0.0319375	0.068075	0.0389375	0.0633	0.010925	0.0240625	0.004775	0.0138875
Mean		7.47363		3.5177	4.22412	0.0549182	0.0879387	0.028364	0.0562335	0.0265542	0.031189	0.00898802	0.0169893	0.00465578	0.0120422
F-statistic for entry		1.58**	1.82**	1.17(NS)	1.65**	1.71**	1.77**	1.73**	1.60**	1.29*	1.85**	2.003**	1.25*	1.16(NS)	1.11(NS)
LSD		2.5708	3.9354	1.5292	1.4466	0.0216	0.0336	0.0116	0.0206	0.0162	0.0184	0.0034	0.0114	0.0024	0.0106
Error Variance		1.66204	3.8498	0.589331	0.525744	0.000115698	0.000280009	3.34e-05	0.000105869	6.4e-05	0.0000834**	3e-06	8.39e-05	2e-06	2.7994e-05
Heritability		0.36	0.46	0.14	0.39	0.42	0.44	0.42	0.38	0.24	0.47	0.5	0.21	0.13	0.1
